# Supplementary material
Source: Springer Nature journal article supplement (https://www.springermedizin.de/resource/supplementary/12916_2012_662_MOESM2_ESM.pdf/9597936)

**F1**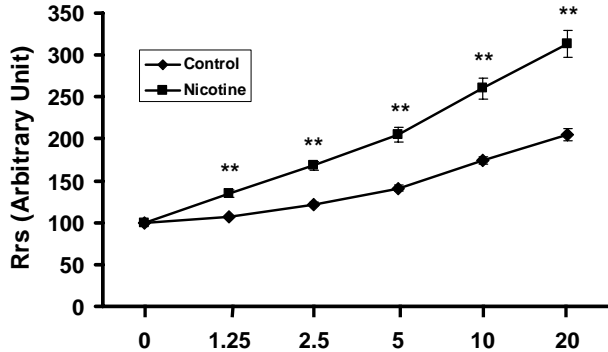**F2**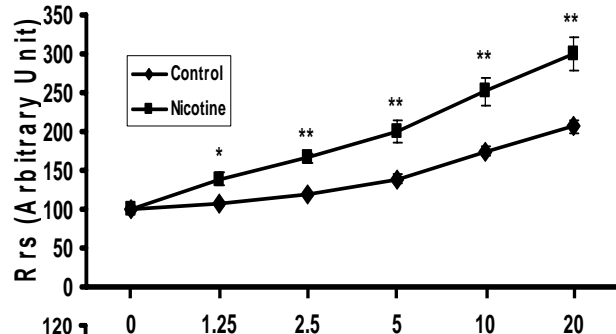**Resistance**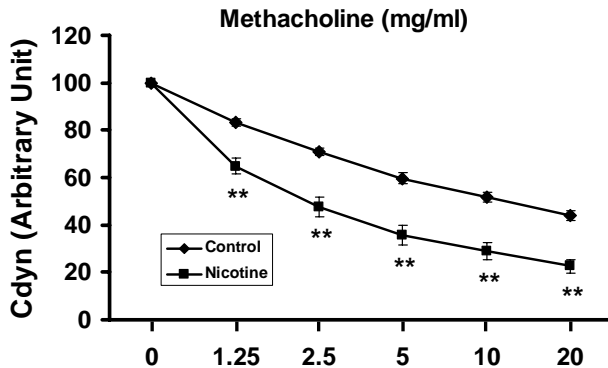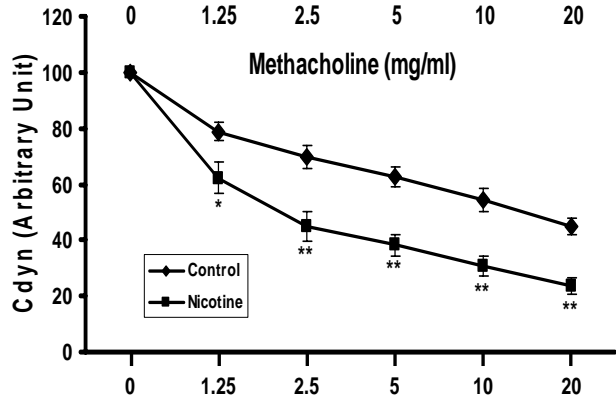**Compliance**

Methacholine (mg/ml)

Methacholine (mg/ml)

Supplement: MOESM2 [file 9597936]
